# Supplementary material for: Micelle-assisted electrodeposition of highly mesoporous Fe–Pt nodular films with soft magnetic and electrocatalytic properties
Source: Royal Society of Chemistry journal article supplement (doi:10.1039/c7nr05561g), 2017-01-01
Supplement: c7nr05561g1.pdf [file c7nr05561g1.pdf]

## Supporting Information

# Micelle-assisted electrodeposition of highly mesoporous Fe-Pt nodular films with soft magnetic and electrocatalytic properties

Eloy Isarain-Chávez<sup>a,\*</sup>, Maria Dolors Baró<sup>a</sup>, Eva Pellicer<sup>a,\*</sup>, Jordi Sort<sup>a,b</sup>

<sup>a</sup>Departament de Física, Universitat Autònoma de Barcelona, E-08193 Bellaterra, Spain

<sup>b</sup>Institució Catalana de Recerca i Estudis Avançats (ICREA), Pg. Lluís Companys 23, E-08010 Barcelona, Spain

| <b>Mesoporous<br/>film</b>     | <b>S<sub>a</sub> (nm)</b> | <b>S<sub>q</sub> (nm)</b> |
|--------------------------------|---------------------------|---------------------------|
| Pt-rich Fe-Pt<br>grown onto Au | 19.27                     | 25.23                     |
| Pt-rich Fe-Pt<br>grown onto Cu | 17.63                     | 24.59                     |
| Pt-rich Fe-Pt<br>grown onto Al | 19.87                     | 27.50                     |
| Fe-rich Fe-Pt<br>grown onto Au | 19.47                     | 24.55                     |

**Table S1:** Values of the arithmetic mean height of the surface (S<sub>a</sub>) and the root mean square height of the surface (S<sub>q</sub>) (which are indicative of the films' surface roughness) obtained for the different investigated samples.

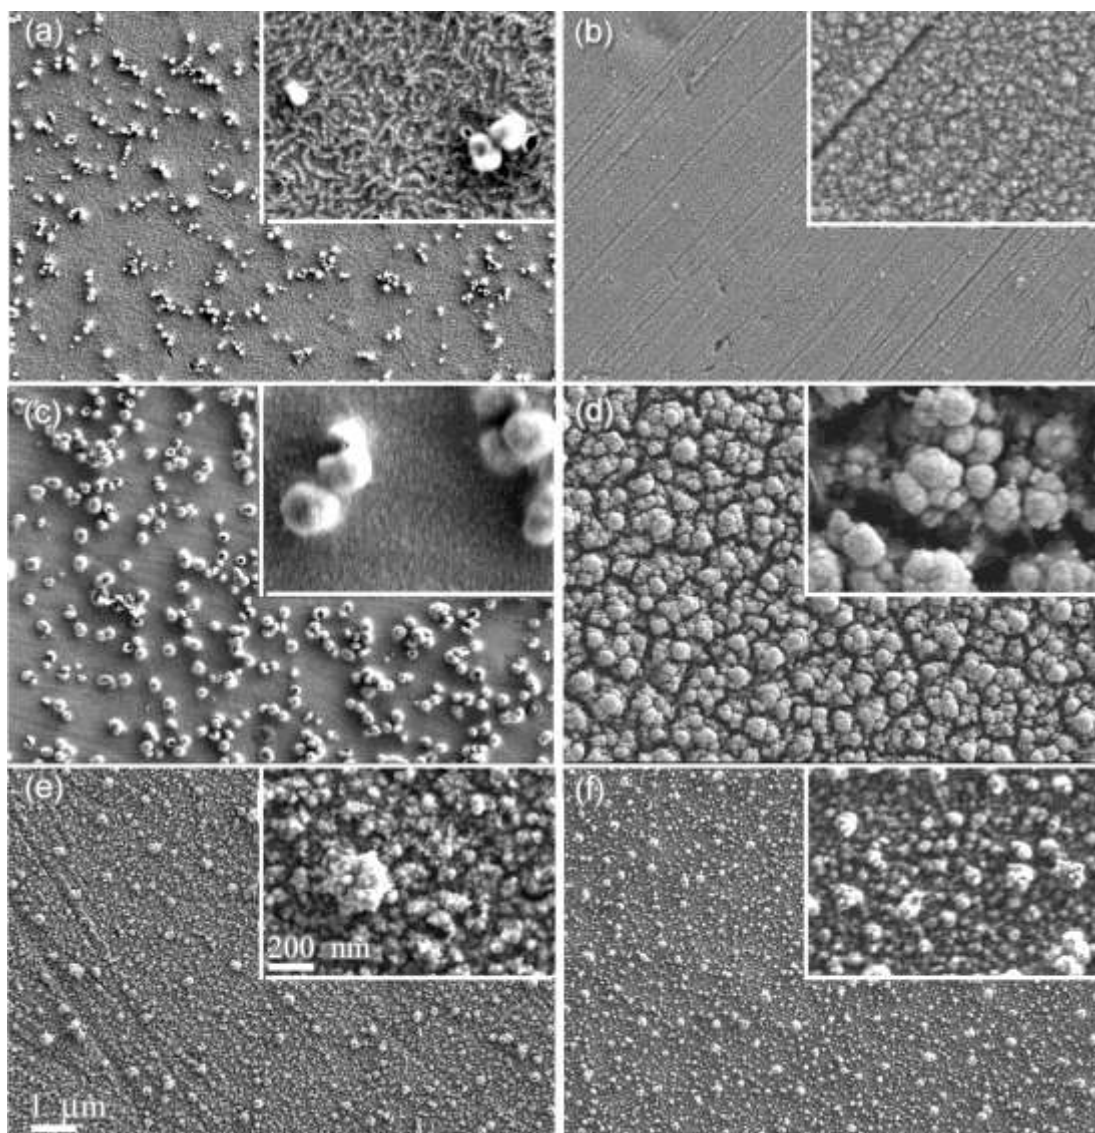

**Fig. S1.** Top-view scanning electron microscopy (SEM) images of Pt-rich Fe-Pt films electrodeposited onto Au-metallized Si substrates using the following conditions: (a) 0.87 mM P123, 600 s deposition time,  $E = -1100$  mV,  $T = 25$  °C,  $\text{pH} = 2.3$ ; (b) 3.48 mM P123, 600 s deposition time,  $E = -1100$  mV,  $T = 25$  °C,  $\text{pH} = 2.3$ , adding ascorbic acid (2.8 mM); (c) 1.71 mM P123, 600 s deposition time,  $E = -1100$  mV,  $T = 25$  °C,  $\text{pH} = 2.3$ ; (d) 3.48 mM P123, 600 s deposition time,  $E = -1100$  mV,  $T = 75$  °C,  $\text{pH} = 2.3$ ; (e) 3.48 mM P123, 900 s deposition time,  $E = -1000$  mV,  $T = 25$  °C; (f) 3.48 mM P123, 600 s deposition time,  $E = -1100$  mV,  $T = 25$  °C adjusting the pH to 2.0.

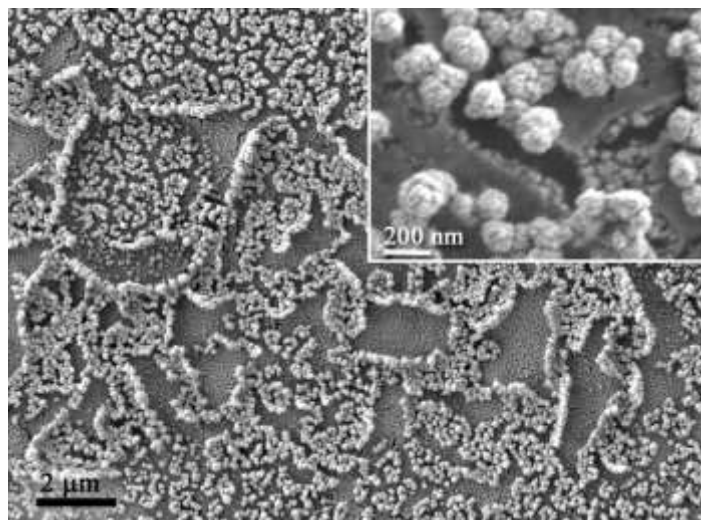

**Fig. S2.** Scanning electron microscopy (SEM) image of the surface of a Pt-rich Fe-Pt layer grown onto the Al substrate, revealing the presence of small clusters, incomplete coating and delamination in some regions (x 10.000). The top right inset shows a detail of this film (x 50.000).

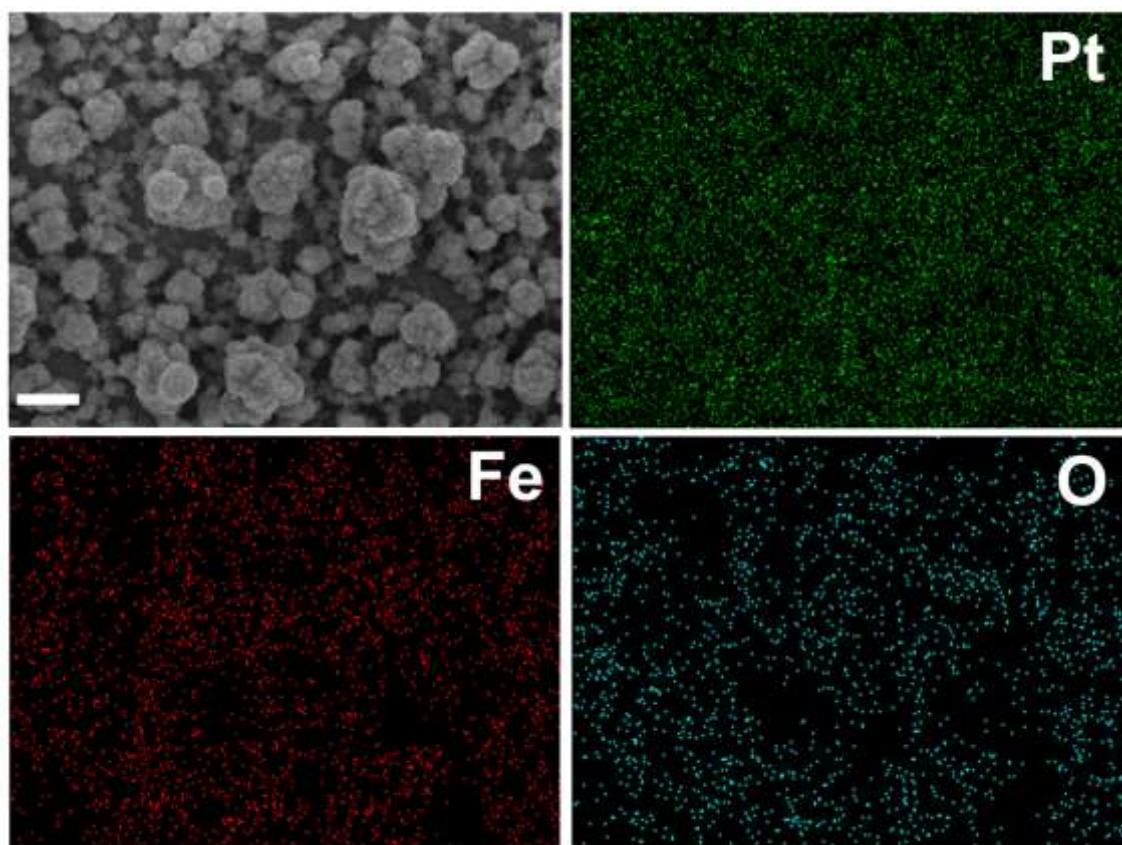

**Fig. S3:** Energy-dispersive X-ray (EDX) mapping images acquired at the surface of the Pt-rich film grown on Au, corresponding to platinum, oxygen and iron atom concentrations. The scale bar is 200 nm.

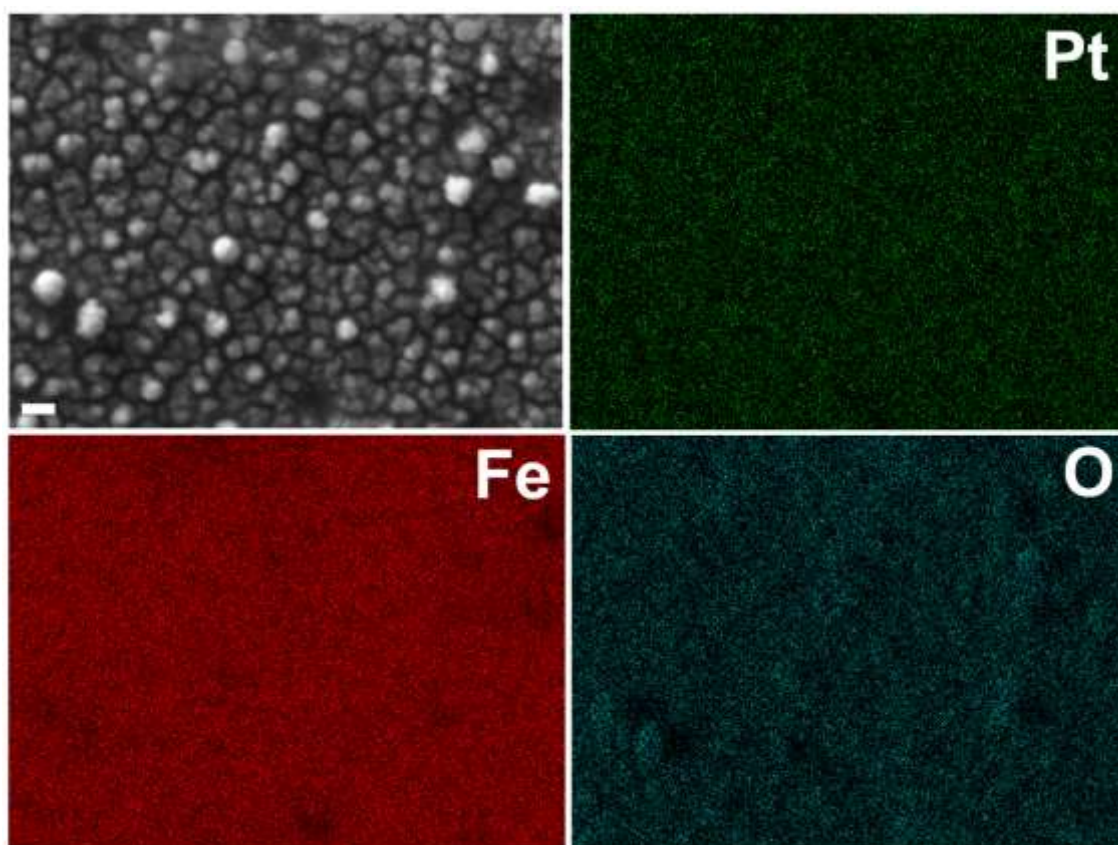

**Fig. S4:** Energy-dispersive X-ray (EDX) mapping images acquired at the surface of the Fe-rich film grown on Au, corresponding to platinum, oxygen and iron atom concentrations. The scale bar is 800 nm.

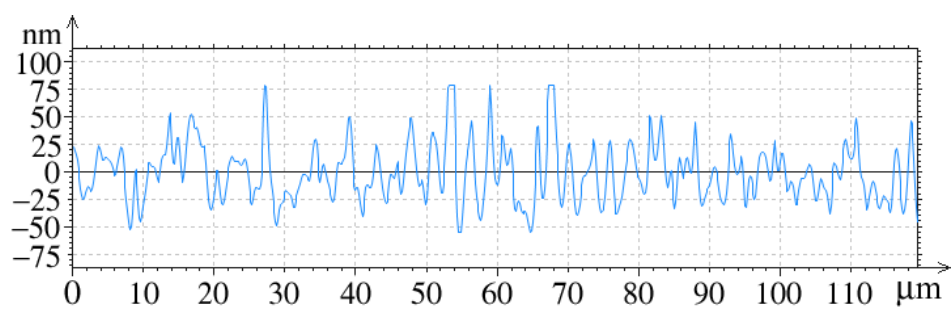

**Fig. S5.** Representative line scan of the height profile obtained from the Pt-rich Fe-Pt film grown onto the evaporated Au layer.

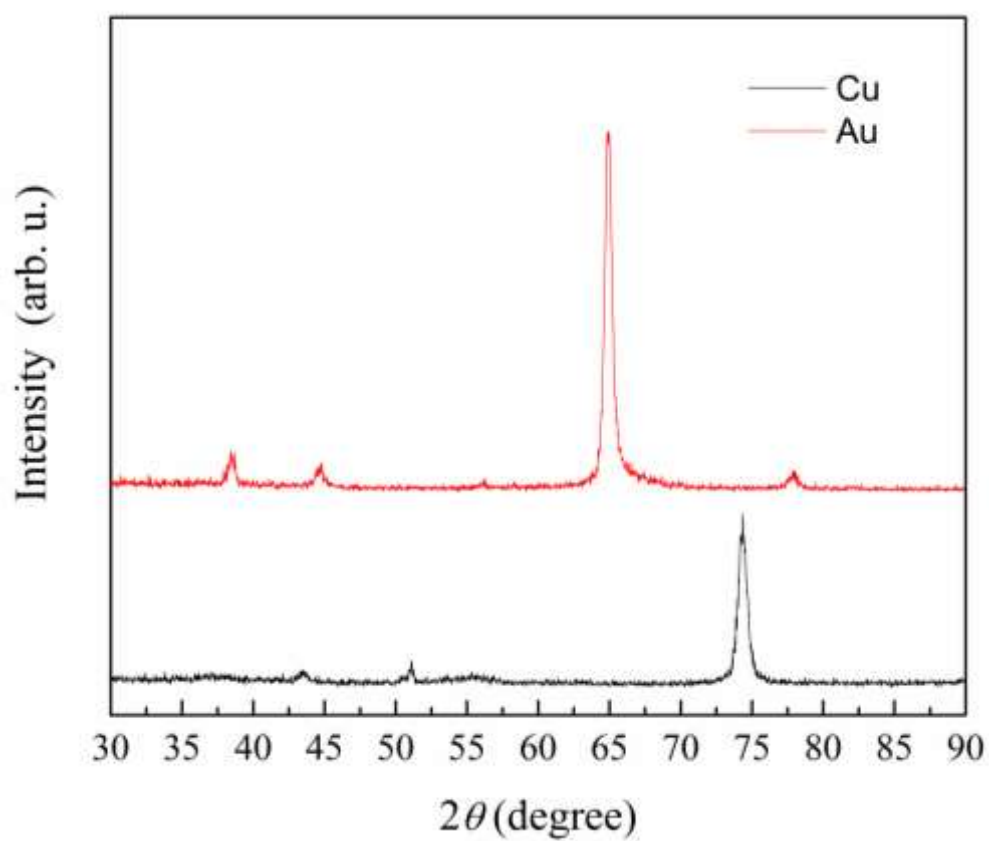

**Fig. S6.** XRD patterns acquired from the substrates with the Cu and Au seed layers, without the electrodeposited Fe-Pt films.



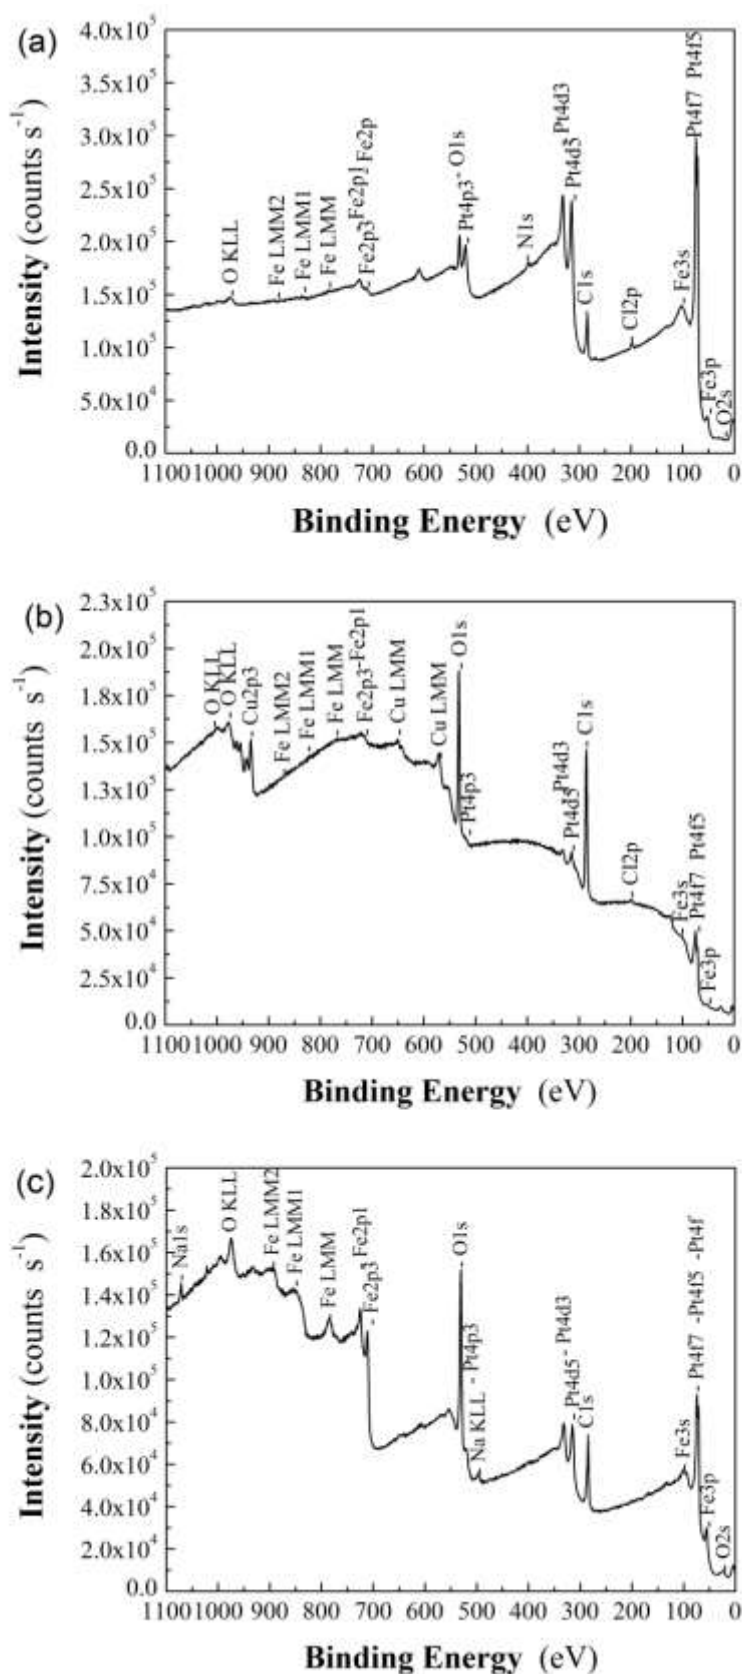

**Fig. S7.** X-ray photoemission spectroscopy (XPS) survey spectra of (a) Pt-rich Fe-Pt films grown onto Au, (b) Pt-rich Fe-Pt grown onto Cu and (c) Fe-rich Fe-Pt grown onto Au, all obtained before Ar<sup>+</sup> ions sputtering.

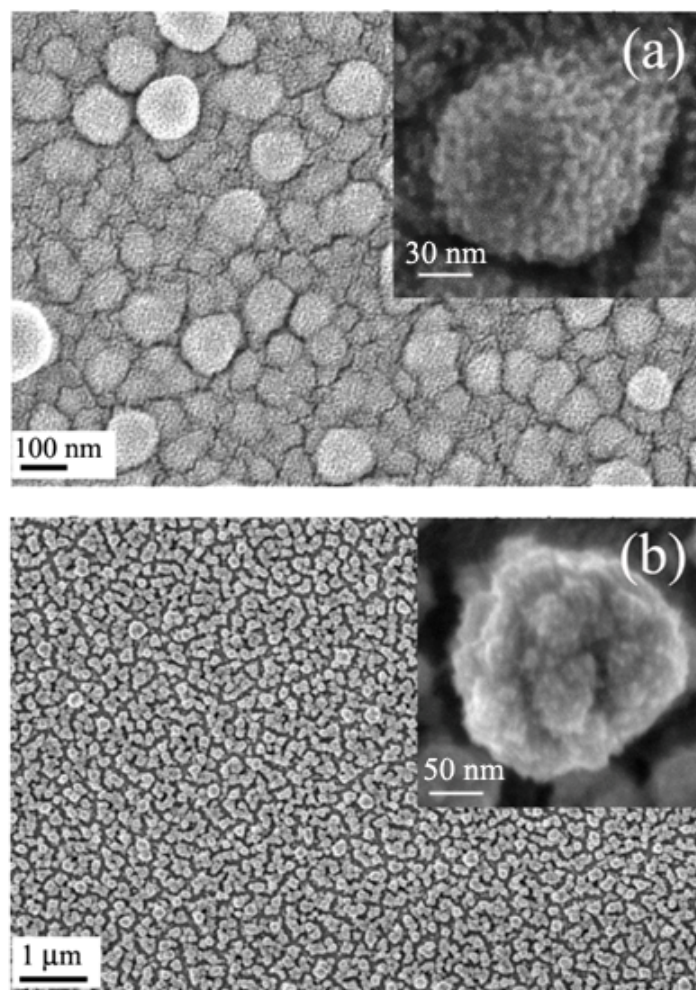

**Fig. S8.** SEM images of the (a) Pt-rich and (b) Fe-rich Fe-Pt films, electrodeposited onto the Au substrates, both obtained after HER experiments in alkaline media. The insets are higher magnification images.

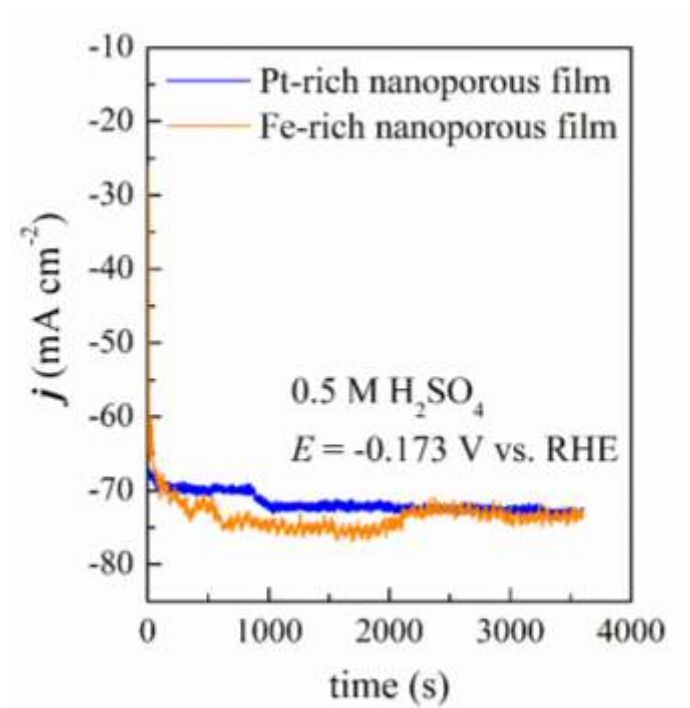

**Figure S9.** Chronoamperometric curves recorded in acidic media for both Pt-rich and Fe-rich nanoporous films (deposited on Au).

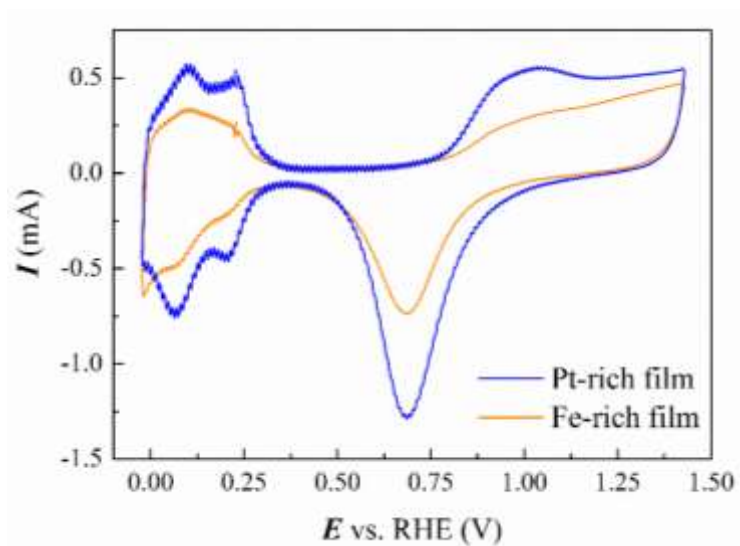

**Figure S10.** CV curves recorded in 0.5 M H<sub>2</sub>SO<sub>4</sub> at 100 mV s<sup>-1</sup> for both Pt-rich and Fe-rich Fe-Pt nanoporous films (deposited on Au) for the determination of the ECSA values.
